# Supplementary material for: Mechanistic insight into the effect of active site motif structures on direct oxidation of methane to methanol over Cu-ZSM-5
Source: Royal Society of Chemistry journal article supplement (doi:10.1039/d3cp01906c), 2023-01-01
Supplement: d3cp01906c1.pdf [file d3cp01906c1.pdf]

## Supplementary Information

### Mechanistic Insight into Effect of Active Site Motif Structure on Direct Oxidation of Methane to Methanol over Cu-ZSM-5

Chengna Dai, Yuchan Zhang, Ning Liu,\* Gangqiang Yu, Ning Wang,  
Ruinian Xu, Biaohua Chen

Faculty of Environment and Life, Beijing University of Technology, Beijing,  
100124, China

\*Correspondence to: liuning@bjut.edu.cn

#### Table of Content

|                                                                                                                                                                                                                                                  |    |
|--------------------------------------------------------------------------------------------------------------------------------------------------------------------------------------------------------------------------------------------------|----|
| Theoretical method of ab initio thermodynamics (AIT) analysis                                                                                                                                                                                    | S1 |
| <b>Fig. S1</b> Comparisons of DFT calculated energies for the Cu-ZSM-5 models with dicopper active sites                                                                                                                                         | S3 |
| <b>Fig. S2</b> TEM-EDX mapping results of elements Cu, Al and Si over Cu-ZSM5-0.3%                                                                                                                                                               | S4 |
| <b>Fig. S3</b> Co-FTIR with the Cu-ZSM-5-0.3% being predated under vacuum condition for 30 min and then the CO was introduced into the system with the signal being monitored at $T$ of 50 °C                                                    | S5 |
| <b>Fig. S4</b> Activity measurement results of H <sub>2</sub> O mediated N <sub>2</sub> O-DMTM over Cu-ZSM-5- $n$ samples ( $n = 0.1, 0.3, 0.5, 0.8$ and 1.2%) for 5 hours.                                                                      | S6 |
| <b>Fig. S5</b> Pulse test after bubbling the CH <sub>3</sub> OH (~2 vol%, He of 40 mL min <sup>-1</sup> ) over CuO/SiO <sub>2</sub> at $T = 300$ °C and with the $m/e$ signal of 44 (CO <sub>2</sub> ) being detected by mass spectrometer (MS). | S7 |
| <b>Fig. S6</b> UV-vis spectra of Cu-ZSM5-0.3% pretreated by N <sub>2</sub> O at $T$ of 250 °C; no peaks being related to [Cu-O-Cu] <sup>2+</sup> species can be observed around 440 nm.                                                          | S8 |
| <b>Fig. S7</b> NH <sub>3</sub> -TPD results of pristine H-ZSM-5 and Cu-ZSM-5-0.3%                                                                                                                                                                | S9 |
| <b>Fig. S8</b> Thermogravimetry (TG) and differential thermogravimetric analysis (DTG) curves of the Cu-BEA-0.3% samples being after long-term test in (a) presence and (b)                                                                      |    |

|                                                                                                                                                                                                                                   |     |
|-----------------------------------------------------------------------------------------------------------------------------------------------------------------------------------------------------------------------------------|-----|
| absence of 20vol% H <sub>2</sub> O.                                                                                                                                                                                               | S10 |
| <b>Fig. S9</b> Theoretical mechanism simulations of H <sub>2</sub> O-mediated and H <sub>2</sub> O-absence N <sub>2</sub> O-DMTM by DFT over Cu-ZSM-5 with [Cu <sub>3</sub> O <sub>2</sub> ] <sup>2+</sup> active site.           | S11 |
| <b>Table S1</b> Product selectivity during N <sub>2</sub> O-DMTM over Cu-ZSM-5-n samples at <i>T</i> of 300 °C.                                                                                                                   | S12 |
| <b>Table S2</b> Comparisons of CH <sub>3</sub> OH productivity and selectivity for Cu-ZSM-0.3% and the other samples from reference.                                                                                              | S13 |
| <b>Reference</b>                                                                                                                                                                                                                  | S14 |
| <b>Table S3</b> Elementary steps and kinetic parameters involved in microkinetic modeling over monomeric [Cu] <sup>+</sup> site during N <sub>2</sub> O-DMTM in both presence and absence of H <sub>2</sub> O.                    | S15 |
| <b>Table S4</b> Elementary steps and kinetic parameters involved in microkinetic modeling over dicopper [Cu] <sup>+</sup> --[Cu] <sup>+</sup> site during N <sub>2</sub> O-DMTM in both presence and absence of H <sub>2</sub> O. | S16 |

## Theoretical method of ab initio thermodynamics (AIT) analysis

The DFT-based ab initio thermodynamics (AIT) were conducted to evaluate the thermostabilities of diverse active site structures under the reaction condition of present work, including  $[\text{Cu}]^+$ ,  $[\text{Cu-O}]^+$ ,  $[\text{Cu}]^{+--}[\text{Cu}]^+$ ,  $[\text{Cu-O-Cu}]^{2+}$  and  $[\text{Cu-OH}]^+$ , according to the Eq. S1.

$$\begin{aligned} & \frac{2m-n-2x-2y+i}{2} \text{N}_2\text{O} + \frac{n-i}{2} \text{H}_2\text{O} + y\text{CuO} + x\text{FeO} + \text{H}_i - \text{Z} \\ f \text{ Fe}_x \text{Cu}_y \text{O}_m \text{H}_n - \text{Z} & + \frac{2m-n-2x-2y+i}{2} \text{N}_2 \end{aligned} \quad (\text{S1})$$

The Gibbs free energy difference  $[\Delta G(T,P)]$  can be calculated according to the Eq. S2:

$$\begin{aligned} \Delta G(T, p) = & G_{\text{Cu}_y \text{O}_m \text{H}_n - \text{Z}} + \frac{2m-n-2x-2y+i}{2} \mu_{\text{N}_2}^g - \\ & E_{\text{H}_i - \text{Z}} - yE_{\text{CuO}} - \frac{n-j}{2} \mu_{\text{H}_2\text{O}}^g - \frac{2m-n-2x-2y+i}{2} \mu_{\text{N}_2\text{O}}^g \end{aligned} \quad (\text{S2})$$

As noted, the bulk CuO as well as H-ZSM-5 (noted as  $\text{H}_i\text{-Z}$ ) was calculated by DFT to derive the  $E_{\text{CuO}}$  and  $E_{\text{H}_i\text{-Z}}$ . As for other reference molecules of  $\text{N}_2$ ,  $\text{N}_2\text{O}$  and  $\text{H}_2\text{O}$ , the related chemical potentials of  $\mu_{\text{N}_2}^g$ ,  $\mu_{\text{N}_2\text{O}}^g$  and  $\mu_{\text{H}_2\text{O}}^g$  was employed in Eq.S2, which can be calculated according to the Eqs. S3-S8.

$$\mu_{\text{N}_2}^g(T, p) = E_{\text{N}_2} + \Delta\mu_{\text{N}_2}(T, p) \quad (\text{S3})$$

$$\mu_{\text{N}_2\text{O}}^g(T, p) = E_{\text{N}_2\text{O}} + \Delta\mu_{\text{N}_2\text{O}}(T, p) \quad (\text{S4})$$

$$\mu_{\text{H}_2\text{O}}^g(T, p) = E_{\text{H}_2\text{O}} + \Delta\mu_{\text{H}_2\text{O}}(T, p) \quad (\text{S5})$$

$$\Delta\mu_{\text{N}_2}(T, p) = \Delta\mu_{\text{N}_2}(T, p^0) + RT \ln\left(\frac{P_{\text{N}_2}}{p^0}\right) \quad (\text{S6})$$

$$= H(T, p^0, \text{N}_2) - H(0\text{K}, p^0, \text{N}_2) - T[S(T, p^0, \text{N}_2) - S(0\text{K}, p^0, \text{N}_2)] + RT \ln\left(\frac{P_{\text{N}_2}}{p^0}\right)$$

$$\Delta\mu_{\text{N}_2\text{O}}(T, p) = \Delta\mu_{\text{N}_2\text{O}}(T, p^0) + RT \ln\left(\frac{P_{\text{N}_2\text{O}}}{p^0}\right) \quad (\text{S7})$$

$$= H(T, p^0, \text{N}_2\text{O}) - H(0\text{K}, p^0, \text{N}_2\text{O}) - T[S(T, p^0, \text{N}_2\text{O}) - S(0\text{K}, p^0, \text{N}_2\text{O})] + RT \ln\left(\frac{P_{\text{N}_2\text{O}}}{p^0}\right)$$

$$\Delta\mu_{\text{H}_2\text{O}}(T, p) = \Delta\mu_{\text{H}_2\text{O}}(T, p^0) + RT \ln\left(\frac{P_{\text{H}_2\text{O}}}{p^0}\right) \quad (\text{S8})$$

$$= H(T, p^0, \text{H}_2\text{O}) - H(0\text{K}, p^0, \text{H}_2\text{O}) - T[S(T, p^0, \text{H}_2\text{O}) - S(0\text{K}, p^0, \text{H}_2\text{O})] + RT \ln\left(\frac{P_{\text{H}_2\text{O}}}{p^0}\right)$$

The reaction energies of  $\Delta E$  can be defined as

$$\Delta E = E_{\text{Cu}_y \text{O}_m \text{H}_n - \text{Z}} + \frac{2m-n-2y+i}{2} E_{\text{N}_2} - E_{\text{H}_i - \text{Z}} - yE_{\text{CuO}} - \frac{n-i}{2} E_{\text{H}_2\text{O}} - \frac{2m-n-2x-2k+i}{2} E_{\text{N}_2\text{O}} \quad (\text{S9})$$

Above all, the  $\Delta G(T,P)$  can be calculated by Eq. S10:

$$\Delta G(T, p) = \Delta E - \frac{2m - n - 2x - 2y + i}{2} [\Delta\mu_{N_2}(T, P) - \Delta\mu_{H_2O}(T, P)] - \frac{n - i}{2} \Delta\mu_{H_2O}(T, P) \quad (S10)$$

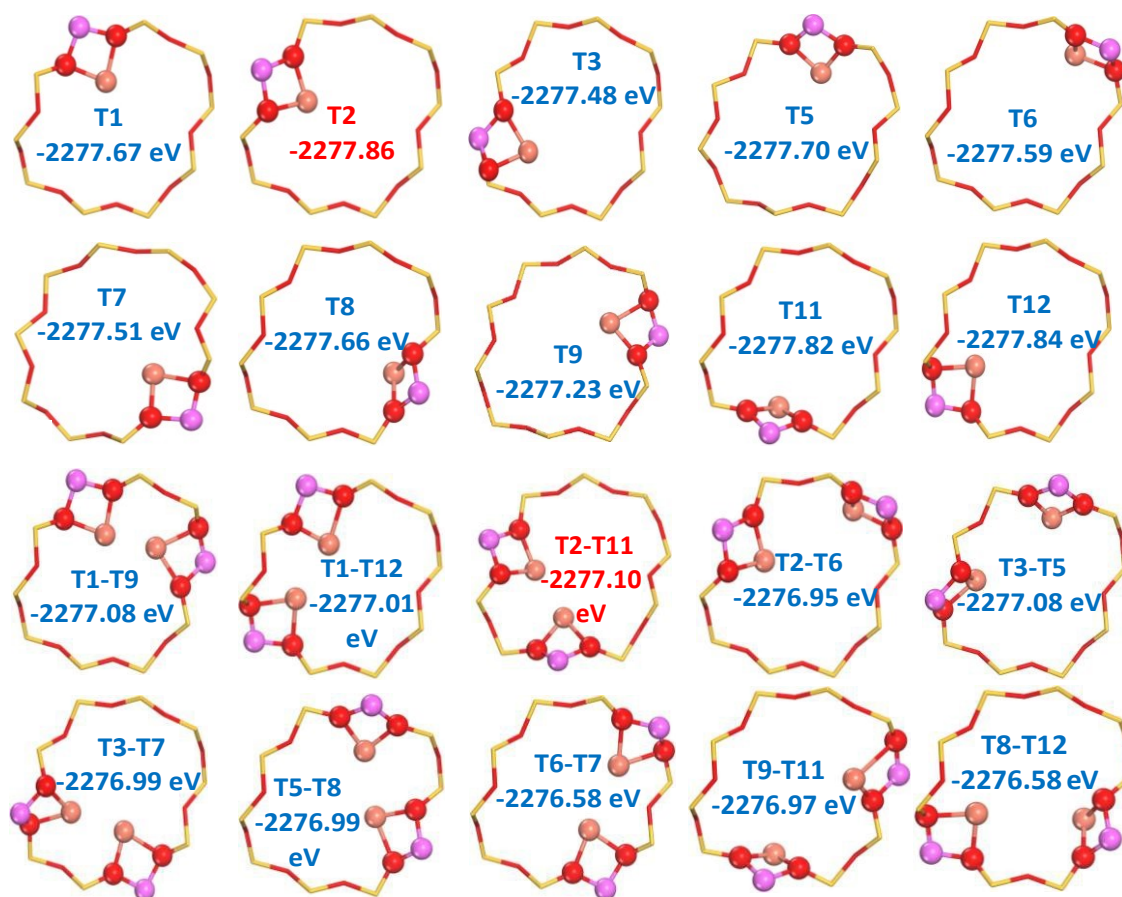

**Fig. S1** Comparisons of DFT calculated energies for the Cu-ZSM-5 models with dicopper active sites being loaded at different T sites. The T2-T11 site was chosen as the dicopper site model, which displays the lowest energy.

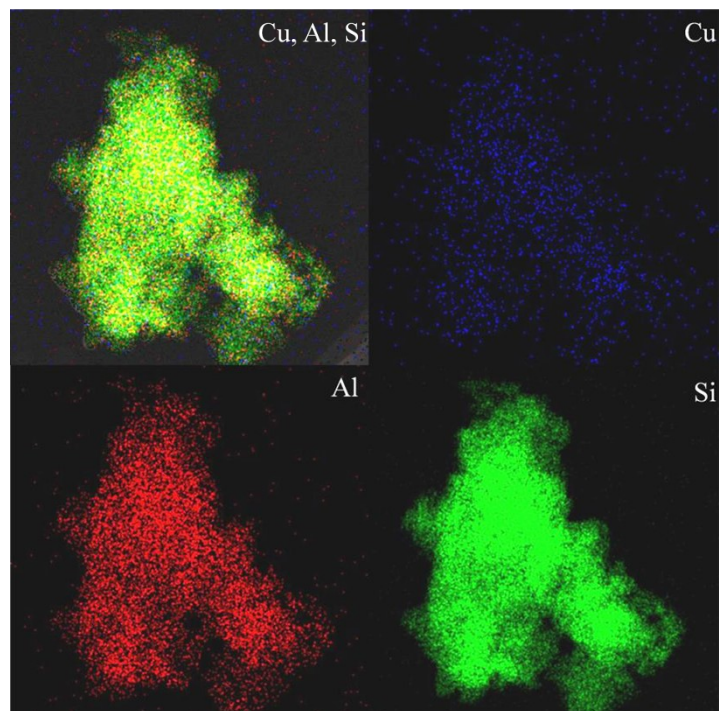

**Fig. S2** TEM-EDX mapping results of elements Cu, Al and Si over Cu-ZSM5-0.3%; the well dispersion of Cu can be observed.

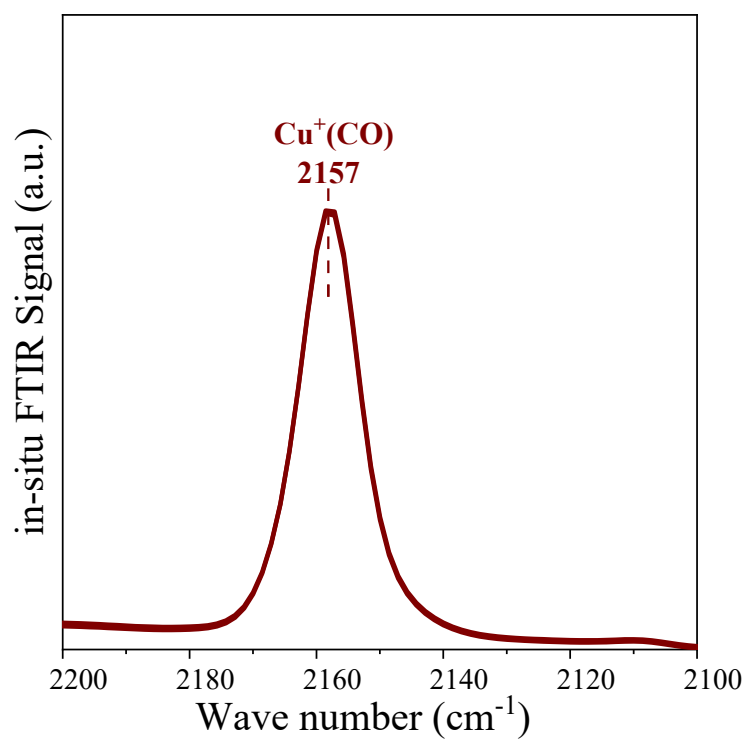

**Fig. S3** Co-FTIR with the Cu-ZSM-5-0.3% being predated at  $T$  of 100 °C under vacuum condition for 30 min; and then the CO was introduced into the system with the signal being monitored at  $T$  of 50 °C.

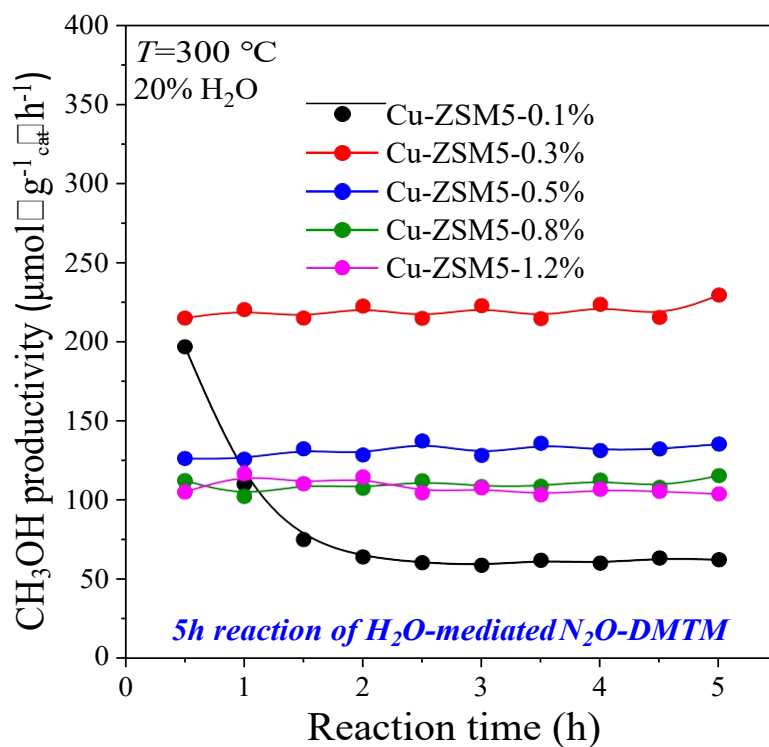

**Fig. S4** Activity measurement results of  $\text{H}_2\text{O}$  mediated  $\text{N}_2\text{O}$ -DMTM over Cu-ZSM5- $n$  samples ( $n = 0.1, 0.3, 0.5, 0.8$  and  $1.2\%$ ) for 5 hours; reaction condition:  $\text{N}_2\text{O} : \text{CH}_4 : \text{H}_2\text{O} : \text{He} = 30 : 15 : 20 : 35$ ;  $\text{GHSV} = 12,000 \text{h}^{-1}$ ;  $T = 300\text{ }^{\circ}\text{C}$ .



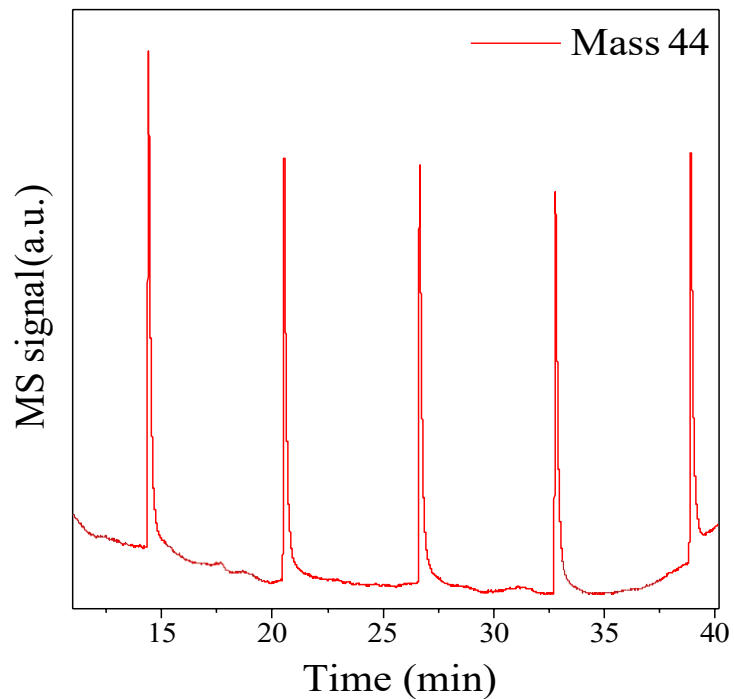

**Fig. S5** Pulse test after bubbling the  $\text{CH}_3\text{OH}$  ( $\sim 2$  vol%, He of  $40 \text{ mL min}^{-1}$ ) over  $\text{CuO/SiO}_2$  at  $T = 300$  °C and with the  $m/e$  signal of 44 ( $\text{CO}_2$ ) being detected by mass spectrometer (MS).

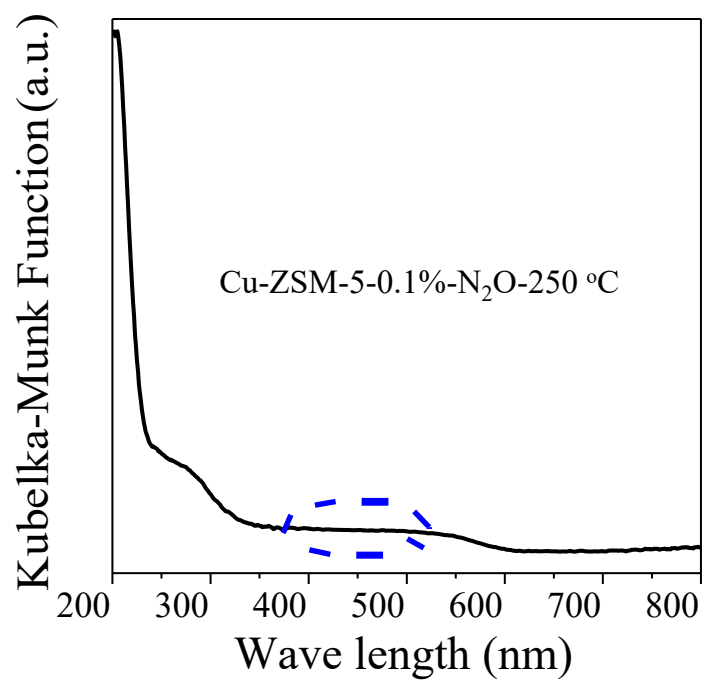

**Fig. S6** UV-vis spectra of Cu-ZSM5-0.3% pretreated by N<sub>2</sub>O at *T* of 250 °C; no peaks being related to [Cu-O-Cu]<sup>2+</sup> species can be observed around 440 nm.

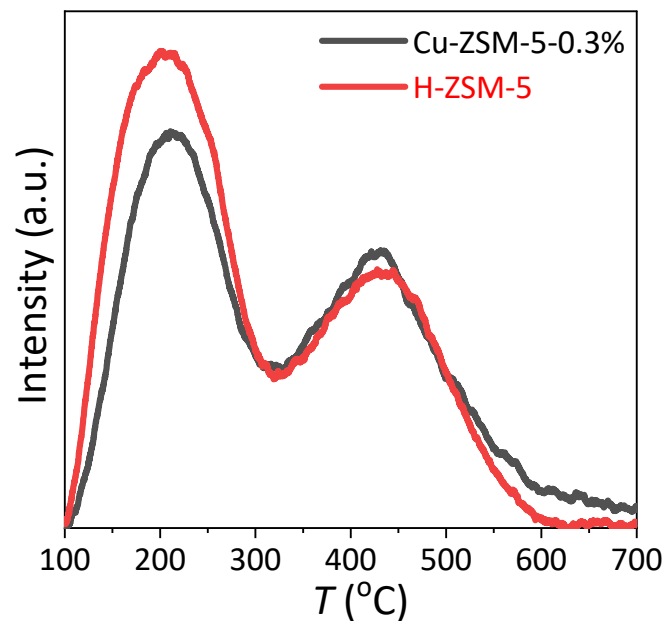

**Fig. S7** NH<sub>3</sub>-TPD results of pristine H-ZSM-5 and Cu-ZSM-5-0.3%

**Note:** Fig. S7 displays the NH<sub>3</sub>-TPD of H-ZSM-5 and Cu-ZSM-5-0.3%. As can be seen, after the SSIE of Cu with H-ZSM-5, the acidity was slightly decreased from 0.82 to 0.68 mmol g<sup>-1</sup> due to Cu loadings.

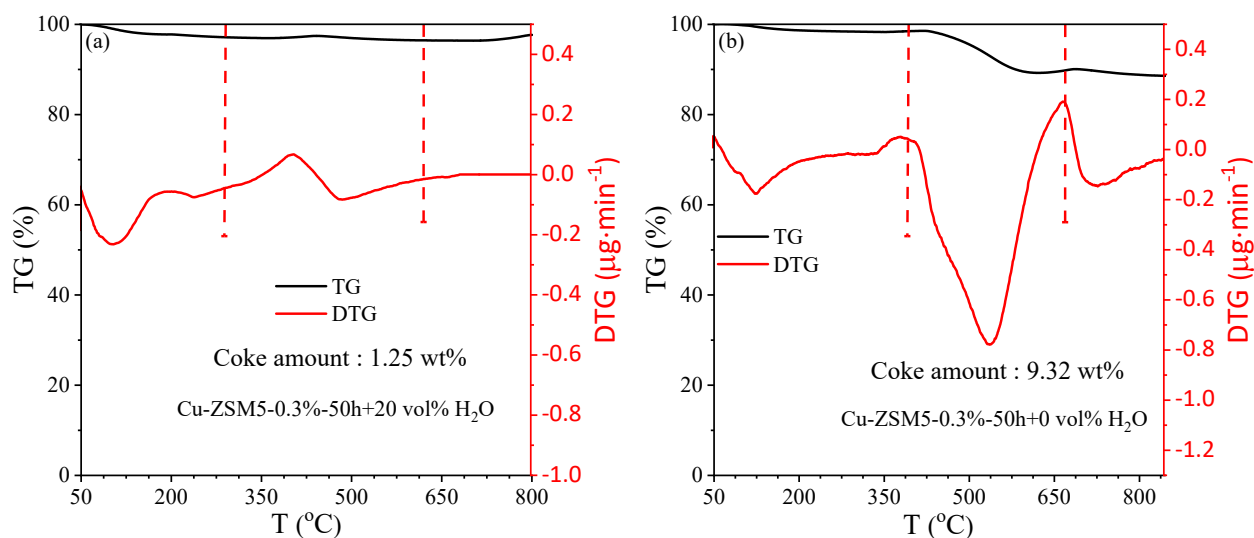

**Fig. S8** Thermogravimetry (TG) and differential thermogravimetric analysis (DTG) curves of the Cu-BEA-0.3% samples being after long-term test in (a) presence and (b) absence of 20vol% H<sub>2</sub>O.

**Note:** Figs. S8a-S8b display the TG results for the sample of Cu-ZSM-5 being after 50h's long-term reaction, in presence and absence of 20% H<sub>2</sub>O. Much more extensive weight decreasing can be obviously found for the scenario of N<sub>2</sub>O-DMTM in absence of H<sub>2</sub>O, based on which the coke deposition amounts were estimated to be as high as 9.32 wt.%, with respect to 1.25 wt.% for the scenario of N<sub>2</sub>O-DMTM in presence of 20 vol% H<sub>2</sub>O.

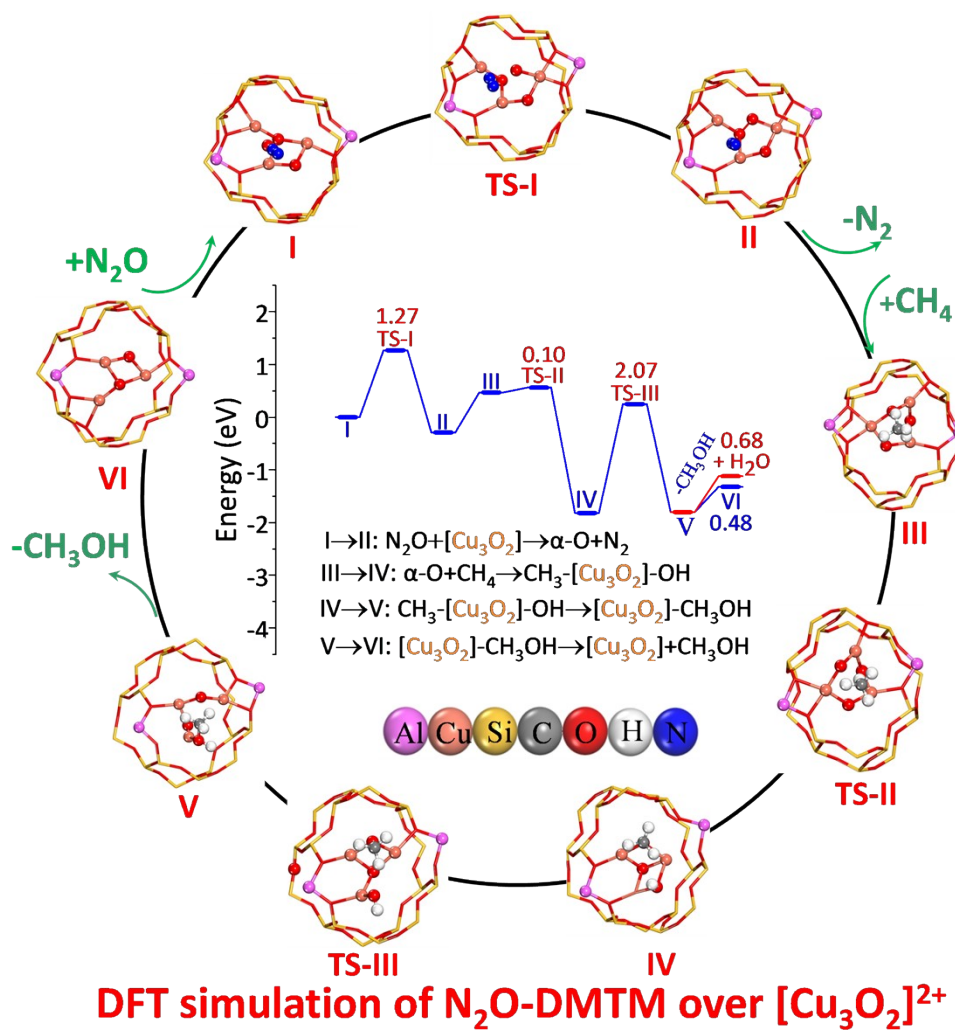

**Fig. S9** Theoretical mechanism simulations of H<sub>2</sub>O-mediated and H<sub>2</sub>O-absence N<sub>2</sub>O-DMTM by DFT over Cu-ZSM-5 with [Cu<sub>3</sub>O<sub>2</sub>]<sup>2+</sup> active site.

**Table S1** Product selectivity during N<sub>2</sub>O-DMTM over Cu-ZSM-5-n samples at *T* of 300 °C.

| Samples                          | <i>T</i><br>(°C) | t<br>(h) | Selectivity (%) |                               |                               |                               |                    |                                 |      |
|----------------------------------|------------------|----------|-----------------|-------------------------------|-------------------------------|-------------------------------|--------------------|---------------------------------|------|
|                                  |                  |          | CO <sub>2</sub> | C <sub>2</sub> H <sub>4</sub> | C <sub>2</sub> H <sub>6</sub> | C <sub>3</sub> H <sub>6</sub> | CH <sub>3</sub> OH | C <sub>2</sub> H <sub>6</sub> O | Coke |
| Cu-ZSM5-0.3%                     | 300              | 5        | 9.8             | 4.7                           | 0.4                           | 1.0                           | 4.1                | 0.6                             | 79.3 |
| Cu-ZSM5-0.3%+10%H <sub>2</sub> O | 300              | 5        | 20.3            | 0.4                           | 0                             | 0                             | 52.3               | 2.7                             | 24.3 |
| Cu-ZSM5-0.3%+30%H <sub>2</sub> O | 300              | 5        | 7.1             | 0.1                           | 0                             | 0                             | 60.0               | 1.5                             | 31.3 |
| Cu-ZSM5-0.1%+20%H <sub>2</sub> O | 300              | 5        | 15.3            | 9.8                           | 0.6                           | 1.9                           | 9.9                | 0.2                             | 62.3 |
| Cu-ZSM5-0.3%+20%H <sub>2</sub> O | 300              | 5        | 10.7            | 0.1                           | 0                             | 0                             | 67.1               | 2.6                             | 19.8 |
| Cu-ZSM5-0.5%+20%H <sub>2</sub> O | 300              | 5        | 53.2            | 0                             | 0                             | 0                             | 31.2               | 1.2                             | 14.4 |
| Cu-ZSM5-0.8%+20%H <sub>2</sub> O | 300              | 5        | 64.1            | 0                             | 0                             | 0                             | 23.1               | 0.7                             | 12.1 |
| Cu-ZSM5-1.2%+20%H <sub>2</sub> O | 300              | 5        | 72.6            | 0                             | 0                             | 0                             | 18.4               | 0.6                             | 8.4  |
| Cu-ZSM5-0.3%                     | 300              | 50       | 31.9            | 3.5                           | 0.3                           | 0.7                           | 16.4               | 2.4                             | 44.8 |
| Cu-ZSM5-0.3%+20%H <sub>2</sub> O | 300              | 50       | 23.0            | 0.6                           | 0                             | 0                             | 66.3               | 4.2                             | 5.9  |

**Table S2** Comparisons of CH<sub>3</sub>OH productivity and selectivity for Cu-ZSM-0.3% and the other samples from reference

| No. | Sample        | method                         | CH <sub>3</sub> OH productivity<br>( $\mu\text{mol g}^{-1}\text{cat}^{-1}\text{h}^{-1}$ ) | CH <sub>3</sub> OH selectivity (%) | CO <sub>2</sub> selectivity (%) | Refs.     |
|-----|---------------|--------------------------------|-------------------------------------------------------------------------------------------|------------------------------------|---------------------------------|-----------|
| 1   | Fe-ZSM-5-2.3% | incipient wetness impregnation | -                                                                                         | 3.1                                | 33                              | [1]       |
| 2   | Fe-ZSM-5-1%F  | freeze-drying                  | 101.6                                                                                     | 10.9                               | 76.4 (CO <sub>x</sub> )         | [2]       |
| 3   | Fe-ZSM-5-1%-E | incipient wetness impregnation | 84.8                                                                                      | 9.1                                | 85.8 (CO <sub>x</sub> )         | [2]       |
| 4   | Fe-ZSM-5-2.5% | chemical vapor impregnation    | 61.5                                                                                      | 16                                 | -                               | [3]       |
| 5   | Fe-ZSM-5-2.0% | incipient wetness impregnation | 72.3                                                                                      | 62                                 | 49.5 (CO <sub>x</sub> )         | [4]       |
| 6   | Cu-ZSM-5-4%   | ion exchange                   | 62                                                                                        | -                                  | -                               | [5]       |
| 7   | Cu-H-ZSM-5    | ion exchange                   | 1.81                                                                                      | -                                  | -                               | [6]       |
| 8   | Fe-ZSM-5-1.5% | chemical vapor impregnation    | -                                                                                         | 15.1                               | 13.6                            | [7]       |
| 9   | Cu-ZSM-5-1.5% | chemical vapor impregnation    | -                                                                                         | 89.1                               | 9.9                             | [7]       |
| 10  | Cu-ZSM-5-0.1% | solid-state ion exchange       | 81.7                                                                                      | 9.9                                | 15.3                            |           |
| 11  | Cu-ZSM-5-0.3% | solid-state ion exchange       | 194.8                                                                                     | 67.1                               | 10.7                            |           |
| 12  | Cu-ZSM-5-0.5% | solid-state ion exchange       | 131.5                                                                                     | 31.2                               | 53.2                            | This work |
| 13  | Cu-ZSM-5-0.8% | solid-state ion exchange       | 110.0                                                                                     | 23.1                               | 64.1                            |           |
| 14  | Cu-ZSM-5-1.2% | solid-state ion exchange       | 108.0                                                                                     | 18.4                               | 72.6                            |           |

## Reference

- [1] G. Zhao, E. Benhelal, A. Adesina, E. Kennedy, M. Stockenhuber, Comparison of Direct, Selective Oxidation of Methane by N<sub>2</sub>O over Fe-ZSM-5, Fe-Beta, and Fe-FER Catalysts, *J. Phys. Chem. C*, 123 (2019) 27436-27447.
- [2] L. Fan, D.-g. Cheng, L. Song, F. Chen, X. Zhan, Direct Conversion of CH<sub>4</sub> to Oxyorganics by N<sub>2</sub>O Using Freeze-drying FeZSM-5, *Chem. Eng. J.*, 369 (2019) 522-528.
- [3] Y.K. Chow, N.F. Dummer, J.H. Carter, R.J. Meyer, R.D. Armstrong, C. Williams, G. Shaw, S. Yacob, M.M. Bhasin, D.J. Willock, S.H. Taylor, G.J. Hutchings, A Kinetic Study of Methane Partial Oxidation over Fe-ZSM-5 Using N<sub>2</sub>O as an Oxidant, *Chem. Phys. Chem*, 19 (2018) 402-411.
- [4] M.V. Parfenov, E.V. Starokon, L.V. Pirutko, G.I. Panov, Quasicatalytic and Catalytic Oxidation of Methane to Methanol by Nitrous Oxide over FeZSM-5 Zeolite, *J. Catal.*, 318 (2014) 14-21.
- [5] V.L. Sushkevich, J.A. van Bokhoven, Methane-to-Methanol: Activity Descriptors in Copper-Exchanged Zeolites for the Rational Design of Materials, *ACS Catal.*, 9 (2019) 6293-6304.
- [6] K. Narsimhan, K. Iyoki, K. Dinh, Y. Roman-Leshkov, Catalytic Oxidation of Methane into Methanol over Copper-Exchanged Zeolites with Oxygen at Low Temperature, *ACS Cent. Sci.*, 2 (2016) 424-429.
- [7] J. Xu, R.D. Armstrong, G. Shaw, N.F. Dummer, S.J. Freakley, S.H. Taylor, G.J. Hutchings, Continuous Selective Oxidation of Methane to Methanol over Cu- and Fe-Modified ZSM-5 Catalysts in a Flow Reactor, *Catal. Today*, 270 (2016) 93-100.



**Table S3** Elementary steps and kinetic parameters involved in microkinetic modeling over monomeric [Cu]<sup>+</sup> site during N<sub>2</sub>O-DMTM in both presence and absence of H<sub>2</sub>O.

| Step | Elementary Step                                                                         | Reaction rate equations                             | $v_{\text{for}}$<br>(s <sup>-1</sup> ) | $v_{\text{rev}}$<br>(s <sup>-1</sup> ) | $\Delta E$<br>(eV) | $\Delta E^{-1}$<br>(eV) |
|------|-----------------------------------------------------------------------------------------|-----------------------------------------------------|----------------------------------------|----------------------------------------|--------------------|-------------------------|
| R1   | Z-Cu □ N <sub>2</sub> O(g) □ Z-Cu-N <sub>2</sub> O                                      | $r_1 = k_1 P_{N_2O} \theta_v - k_{-1} \theta_{N_2}$ | 0.02                                   | 4.50 × 10 <sup>18</sup>                | -                  | 0.70                    |
| R2   | Z-Cu-N <sub>2</sub> O □ Z-Cu-O □ N <sub>2</sub> (g)                                     |                                                     | 2.53 × 10 <sup>12</sup>                | -                                      | 1.41               | -                       |
| R3   | Z-Cu-O + CH <sub>4</sub> □ Z-Cu-OH-CH <sub>3</sub>                                      |                                                     | 4.61 × 10 <sup>12</sup>                | 4.18 × 10 <sup>14</sup>                | 0.09               | 4.54                    |
| R4   | Z-Cu-OH-CH <sub>3</sub> □ Z-Cu-CH <sub>3</sub> OH                                       |                                                     | 3.59 × 10 <sup>13</sup>                | 8.73 × 10 <sup>13</sup>                | 0.34               | 1.38                    |
| R5   | Z-Cu-CH <sub>3</sub> OH □ Z-Cu + CH <sub>3</sub> OH(g)                                  |                                                     | 4.70 × 10 <sup>19</sup>                | -                                      | 1.45               | -                       |
| R5'  | Z-Cu-CH <sub>3</sub> OH □ $\overset{H^+}{\square} \square$ Z-Cu + CH <sub>3</sub> OH(g) |                                                     | 4.70 × 10 <sup>19</sup>                | -                                      | 0.55               | -                       |

**Table S4** Elementary steps and kinetic parameters involved in microkinetic modeling over dicopper [Cu]<sup>+</sup>--[Cu]<sup>+</sup> site during N<sub>2</sub>O-DMTM in both presence and absence of H<sub>2</sub>O.

| Step | Elementary Steps                                                                                                       | Reaction rate equations                                                                             | $v_{\text{for}} (\text{s}^{-1})$ | $v_{\text{rev}} (\text{s}^{-1})$ | $\Delta E$ (eV) | $\Delta E^{-1}$ (eV) |
|------|------------------------------------------------------------------------------------------------------------------------|-----------------------------------------------------------------------------------------------------|----------------------------------|----------------------------------|-----------------|----------------------|
| R1   | $\text{Z-Cu}_2 \square \text{N}_2\text{O}(\text{g}) \square \text{Z-Cu}_2\text{-N}_2\text{O}$                          | $r_1 \square k_1 P_{\text{N}_2\text{O}} \square v \square k_{-1} \square_{\text{N}_2\text{O}}$      | 0.02                             | $1.17 \times 10^{21}$            | -               | 1.23                 |
| R2   | $\text{Z-Cu}_2\text{-N}_2\text{O} \square \text{Z-Cu}_2\text{-O} + \text{N}_2 \square \text{g} \square$                | $r_2 \square k_2 \square_{\text{N}_2\text{O}}$                                                      | $1.69 \times 10^{13}$            | -                                | 0.92            | -                    |
| R3   | $\text{Z-Cu}_2\text{-O} + \text{CH}_4 \square \text{g} \square \square \text{Z-Cu}_2\text{-CH}_3\text{-OH}$            | $r_3 \square k_3 \square_{\text{O}} P_{\text{CH}_4} \square k_{-3} \square_{\text{CH}_3\text{-OH}}$ | $2.25 \times 10^{11}$            | $1.07 \times 10^{13}$            | 0.71            | 0.73                 |
| R4   | $\text{Z-Cu}_2\text{-CH}_3\text{-OH} \square \text{Z-Cu}_2\text{-CH}_3\text{OH}$                                       | $r_4 \square k_4 \square_{\text{CH}_3\text{-OH}} \square k_{-4} \square_{\text{CH}_3\text{OH}}$     | $7.70 \times 10^{12}$            | $4.72 \times 10^{13}$            | 0.08            | 1.06                 |
| R5   | $\text{Z-Cu}_2\text{-CH}_3\text{OH} \square \text{Z-Cu}_2 + \text{CH}_3\text{OH}(\text{g})$                            | $r_5 \square k_5 \square_{\text{CH}_3\text{OH}}$                                                    | $9.77 \times 10^{21}$            | -                                | 2.02            | -                    |
| R5'  | $\text{Z-Cu}_2\text{-CH}_3\text{OH} \square \text{H}_2\text{O} \square \text{Z-Cu}_2 + \text{CH}_3\text{OH}(\text{g})$ | $r_5 \square k_5 \square_{\text{CH}_3\text{OH}}$                                                    | $9.77 \times 10^{21}$            | -                                | 0.01            | -                    |
